# Supplementary material for: Identification of Candidate Genes for Min Pig Villi Hair Traits by Genome-Wide Association of Copy Number Variation
Source: MDPI journal article supplement (doi:10.3390/vetsci10050307), 2023-04-23

Figure S1: The intersection of CNV510, CNV552, and CNV734 with swine QTL data

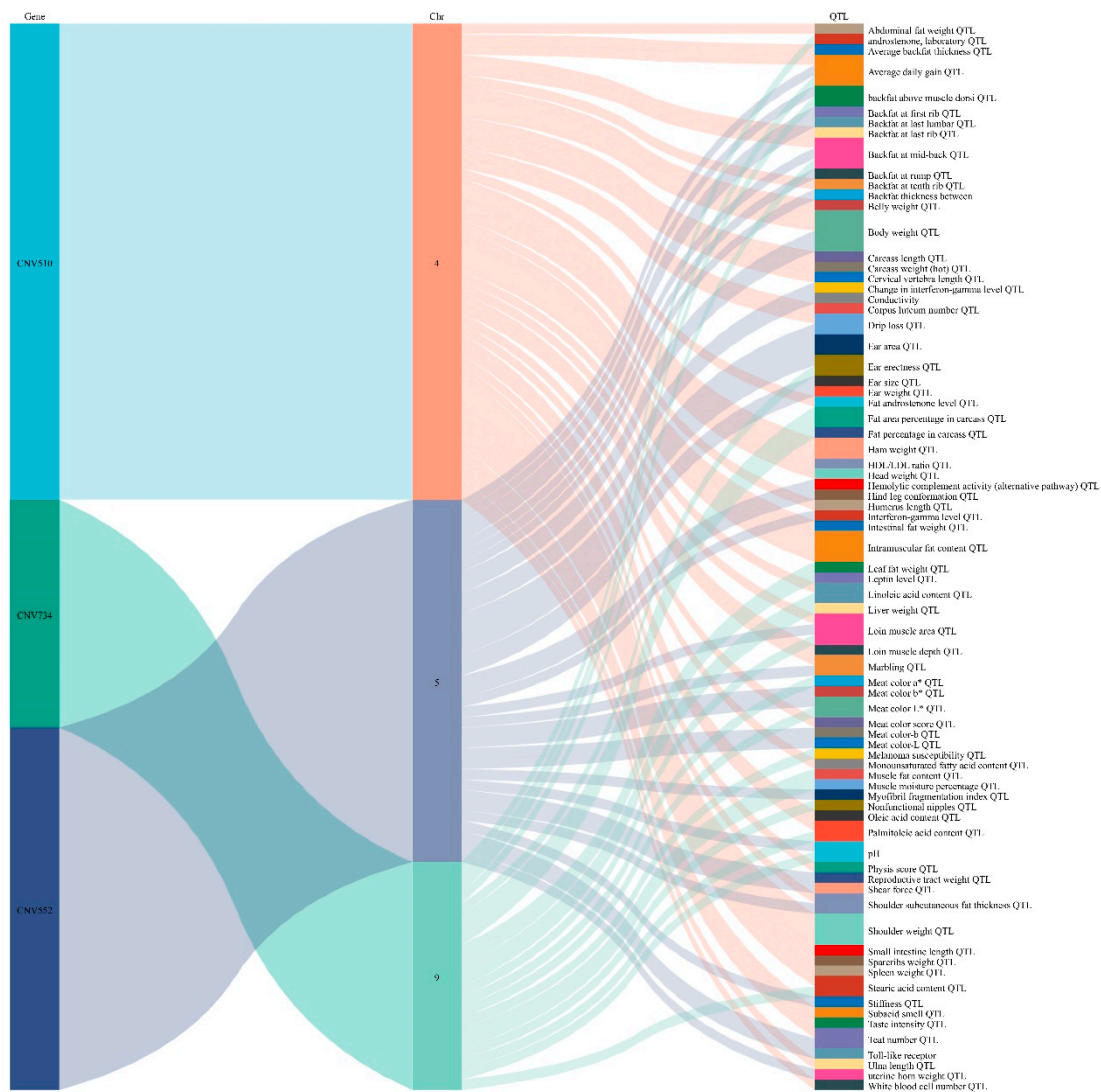

Figure S2: The intersection of CNV 22, CNV267, and CNV390 with swine QTL data

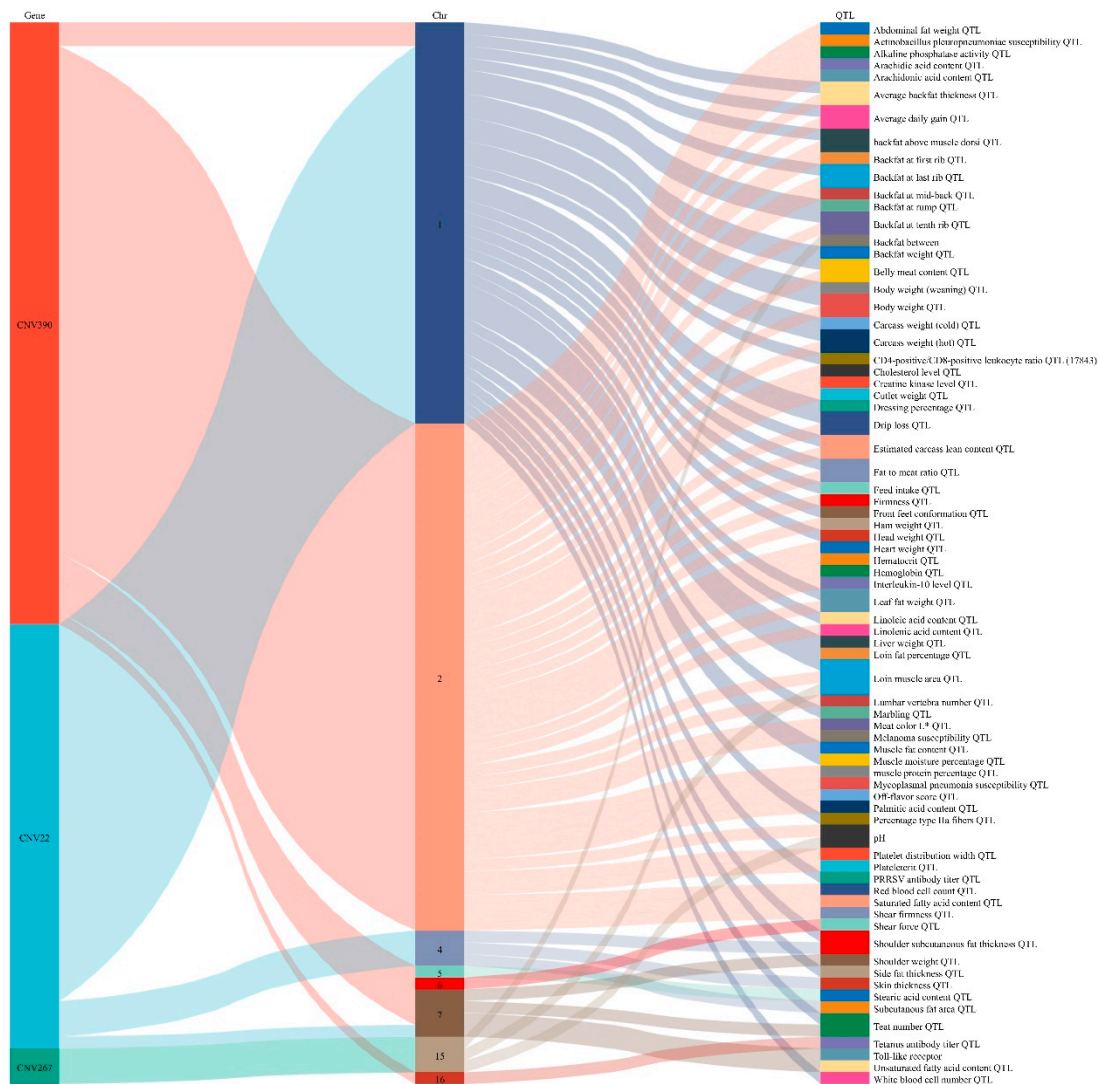

Figure S3: The intersection of CNV321, CNV330, CNV720 and CNV107 with swine QTL data

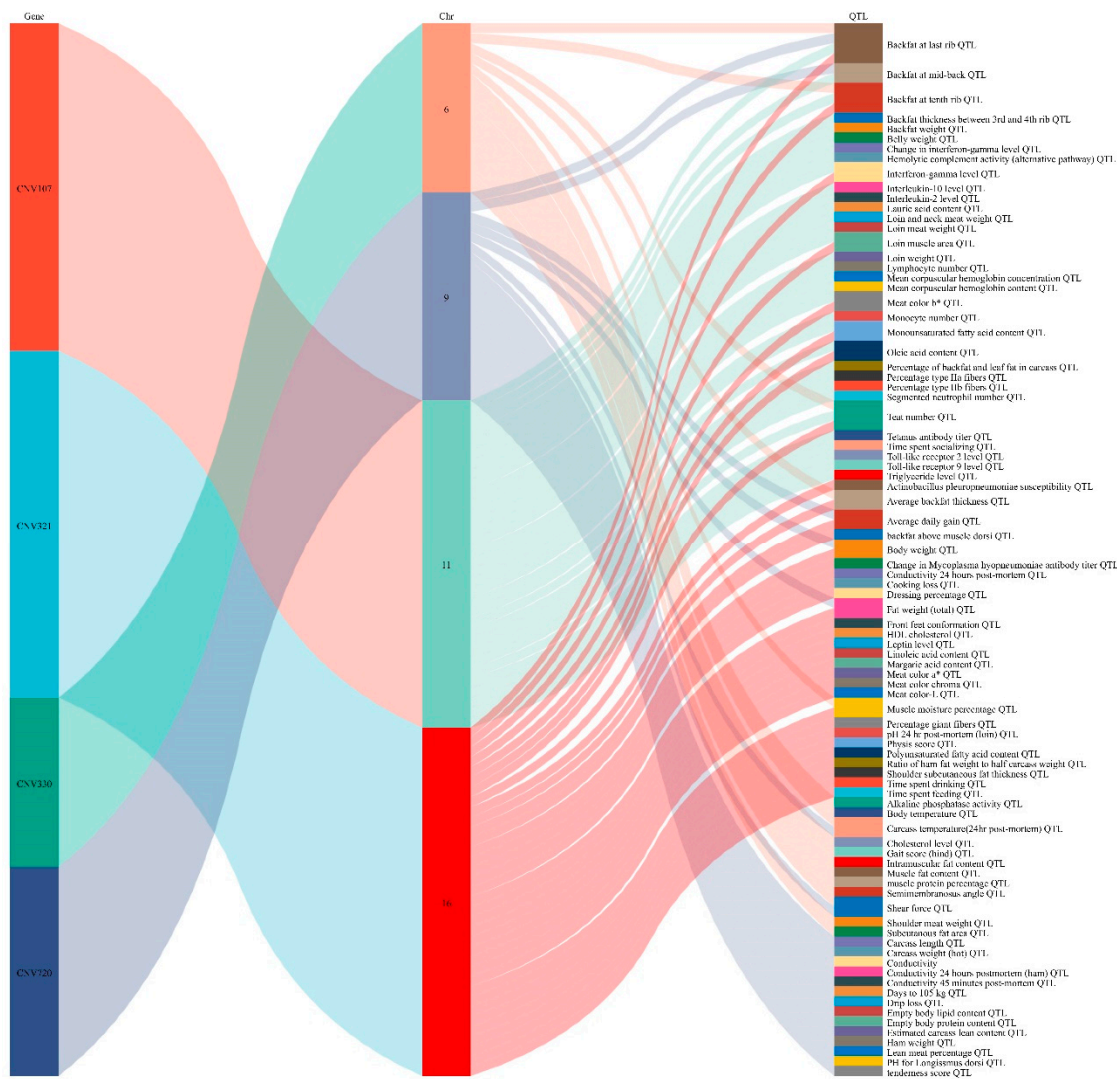

Supplement: s1 [file s1]
